# Supplementary material for: Communities of Arbuscular Mycorrhizal Fungi Detected in Forest Soil Are Spatially Heterogeneous but Do Not Vary throughout the Growing Season
Source: PLoS One. 2012 Aug 7;7(8):e41938. doi: 10.1371/journal.pone.0041938 (PMC3413688; doi:10.1371/journal.pone.0041938)
Supplement: Table S2 — AMF VT detected in soil samples. (XLS) [file pone.0041938.s005.xls]

## Sheet: Sheet1
Family	Genus	Virtual taxon	MayA	JuneA	JulyA	SeptA	SeptB	SeptC	Total sequences
Acaulosporaceae	Acaulospora	VTX00015	0	0	0	0	14	21	35
	Acaulospora	VTX00228	0	0	0	0	0	2	2
	Acaulospora	VTX00230	0	0	0	0	4	0	4
Archaeosporaceae	Archaeospora	VTX00004	21	0	9	0	3	1	34
Diversisporaceae	Glomus	VTX00062	8	3	11	0	10	7	39
	Glomus	VTX00306	0	0	0	0	38	6	44
Gigasporaceae	Scutellospora	VTX00049	13	3	3	0	3	0	22
Glomeraceae	Glomus	VTX00064	0	4	0	35	92	0	131
	Glomus	VTX00074	353	123	1717	19	507	486	3205
	Glomus	VTX00113	12	123	0	243	125	145	648
	Glomus	VTX00115	46	57	0	0	30	12	145
	Glomus	VTX00117	19	0	21	1	0	0	41
	Glomus	VTX00125	0	0	0	0	0	1	1
	Glomus	VTX00129	23	17	0	4	0	0	44
	Glomus	VTX00130	0	0	0	0	0	2	2
	Glomus	VTX00140	63	8	1	0	0	0	72
	Glomus	VTX00142	247	307	78	0	59	12	703
	Glomus	VTX00143	220	22	0	0	7	0	249
	Glomus	VTX00149	87	0	0	29	7	2	125
	Glomus	VTX00159	0	1	0	0	0	0	1
	Glomus	VTX00160	64	25	84	36	3	22	234
	Glomus	VTX00166	11	132	11	2	50	232	438
	Glomus	VTX00187	0	0	0	0	17	0	17
	Glomus	VTX00191	15	40	42	0	65	41	203
	Glomus	VTX00194	8	3	0	0	81	12	104
	Glomus	VTX00196	0	2	0	0	0	0	2
	Glomus	VTX00199	842	2560	0	233	175	70	3880
	Glomus	VTX00214	0	0	0	0	0	1	1
	Glomus	VTX00222	0	0	0	0	0	1	1
	Glomus	VTX00229	0	0	0	0	0	1	1
	Glomus	VTX00233	25	0	0	2	0	0	27
	Glomus	VTX00247	0	0	0	1	1	0	2
	Glomus	VTX00273	0	0	0	0	1	0	1
	Glomus	VTX00305	6	0	0	0	0	0	6
Glomus group B	Glomus	VTX00057	117	101	9	1	63	0	291
	Glomus	VTX00193	112	264	606	886	622	70	2560
Paraglomeraceae	Paraglomus	VTX00281	0	3	0	0	0	2	5
Total sequences			2312	3798	2592	1492	1977	1149
Total VT			21	20	12	13	23	22	37
